# Supplementary material
Source: Research Square preprint supplement (doi:10.21203/rs.3.rs-10134326/v1)
Supplement: Supplementary file 1 [file 6e7fff5359f01d7f166240e5.docx]

This research did not receive any specific grant from funding agencies in the public, commercial, or not-for-profit sectors
